# Supplementary material for: Computed tomography-based radiomics decodes prognostic and molecular differences in interstitial lung disease related to systemic sclerosis
Source: PubMed Central journal article supplement — Eur Respir J. 2022 May 19;59(5):2004503. doi: 10.1183/13993003.04503-2020 (PMC9117734; doi:10.1183/13993003.04503-2020), 2022-05-19

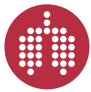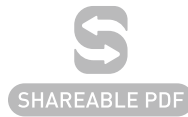

# Computed tomography-based radiomics decodes prognostic and molecular differences in interstitial lung disease related to systemic sclerosis

Janine Schniering <sup>1,2</sup>, Malgorzata Maciukiewicz<sup>1</sup>, Hubert S. Gabrys<sup>3</sup>, Matthias Brunner<sup>1,4</sup>, Christian Blüthgen<sup>5</sup>, Chantal Meier<sup>1</sup>, Sophie Braga-Lagache<sup>6</sup>, Anne-Christine Uldry<sup>6</sup>, Manfred Heller<sup>6</sup>, Matthias Guckenberger<sup>3</sup>, Håvard Fretheim<sup>7</sup>, Christos T. Nakas <sup>8,9</sup>, Anna-Maria Hoffmann-Vold<sup>7</sup>, Oliver Distler<sup>1</sup>, Thomas Frauenfelder<sup>5</sup>, Stephanie Tanadini-Lang <sup>3</sup> and Britta Maurer <sup>1,4</sup>

<sup>1</sup>Center of Experimental Rheumatology, Dept of Rheumatology, University Hospital Zurich, University of Zurich, Zurich, Switzerland. <sup>2</sup>Institute of Lung Biology and Disease and Comprehensive Pneumology Center, Helmholtz Zentrum München, Member of the German Center for Lung Research (DZL), Munich, Germany. <sup>3</sup>Dept of Radiation Oncology, University Hospital Zurich, University of Zurich, Zurich, Switzerland. <sup>4</sup>Dept of Rheumatology and Immunology, University Hospital Bern, University Bern, Bern, Switzerland. <sup>5</sup>Institute of Diagnostic and Interventional Radiology, University Hospital Zurich, University of Zurich, Zurich, Switzerland. <sup>6</sup>Proteomics and Mass Spectrometry Core Facility, Dept for BioMedical Research (DBMR), University of Bern, Bern, Switzerland. <sup>7</sup>Dept of Rheumatology, Oslo University Hospital and Institute of Clinical Medicine, University of Oslo, Oslo, Norway. <sup>8</sup>Laboratory of Biometry, University of Thessaly, Volos, Greece. <sup>9</sup>University Institute of Clinical Chemistry, Inselspital, Bern University Hospital, University of Bern, Bern, Switzerland.

Corresponding author: Britta Maurer ([britta.maurer@insel.ch](mailto:britta.maurer@insel.ch))

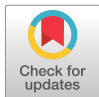

Shareable abstract (@ERSpublications)

CT-based radiomics decodes phenotypic, prognostic and molecular differences in SSc-ILD, and predicts progression-free survival with a significant impact on future clinical decision making in SSc-ILD <https://bit.ly/3zPaMOn>

**Cite this article as:** Schniering J, Maciukiewicz M, Gabrys HS, *et al.* Computed tomography-based radiomics decodes prognostic and molecular differences in interstitial lung disease related to systemic sclerosis. *Eur Respir J* 2022; 59: 2004503 [DOI: 10.1183/13993003.04503-2020].

This single-page version can be shared freely online.

Copyright ©The authors 2022.

This version is distributed under the terms of the Creative Commons Attribution Non-Commercial Licence 4.0. For commercial reproduction rights and permissions contact [permissions@ersnet.org](mailto:permissions@ersnet.org)

Received: 12 Dec 2020  
Accepted: 23 Sept 2021

## Abstract

**Background** Radiomic features calculated from routine medical images show great potential for personalised medicine in cancer. Patients with systemic sclerosis (SSc), a rare, multiorgan autoimmune disorder, have a similarly poor prognosis due to interstitial lung disease (ILD). Here, our objectives were to explore computed tomography (CT)-based high-dimensional image analysis (“radiomics”) for disease characterisation, risk stratification and relaying information on lung pathophysiology in SSc-ILD.

**Methods** We investigated two independent, prospectively followed SSc-ILD cohorts (Zurich, derivation cohort, n=90; Oslo, validation cohort, n=66). For every subject, we defined 1355 robust radiomic features from standard-of-care CT images. We performed unsupervised clustering to identify and characterise imaging-based patient clusters. A clinically applicable prognostic quantitative radiomic risk score (qRISSc) for progression-free survival (PFS) was derived from radiomic profiles using supervised analysis. The biological basis of qRISSc was assessed in a cross-species approach by correlation with lung proteomic, histological and gene expression data derived from mice with bleomycin-induced lung fibrosis.

**Results** Radiomic profiling identified two clinically and prognostically distinct SSc-ILD patient clusters. To evaluate the clinical applicability, we derived and externally validated a binary, quantitative radiomic risk score (qRISSc) composed of 26 features that accurately predicted PFS and significantly improved upon clinical risk stratification parameters in multivariable Cox regression analyses in the pooled cohorts. A high qRISSc score, which identifies patients at risk for progression, was reverse translatable from human to experimental ILD and correlated with fibrotic pathway activation.

**Conclusions** Radiomics-based risk stratification using routine CT images provides complementary phenotypic, clinical and prognostic information significantly impacting clinical decision making in SSc-ILD.

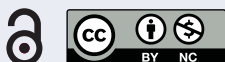

Supplement: ERJ-04503-2020.Shareable.pdf [file ERJ-04503-2020.Shareable.pdf]
